# Supplementary material for: TSSC4 is a component of U5 snRNP that promotes tri-snRNP formation
Source: PubMed Central journal article supplement (PMC8206348; doi:10.1038/s41467-021-23934-y), 2021-06-15
Supplement: 41467_2021_23934_MOESM3_ESM.pdf [file 41467_2021_23934_MOESM3_ESM.pdf]

## **Description of Additional Supplementary Files**

File name: Supplementary Data 1

Description: Characterization of proteins coprecipitating with TSSC4-GFP and TSSC4-FLAG by SILAC-IP. The ratio M/L shows a SILAC ratio of medium labeled proteins co-precipitated with tagged TSSC4 (M) and control immunoprecipitation from unlabeled cells (L).
